# Supplementary material for: Automatic control: the vertebral column of dogfish sharks behaves as a continuously variable transmission with smoothly shifting functions
Source: Oxford University Press journal article supplement (doi:10.1242/jeb.135251), 2016-09-15
Supplement: jeb135251supp.pdf [file jeb135251supp.pdf]

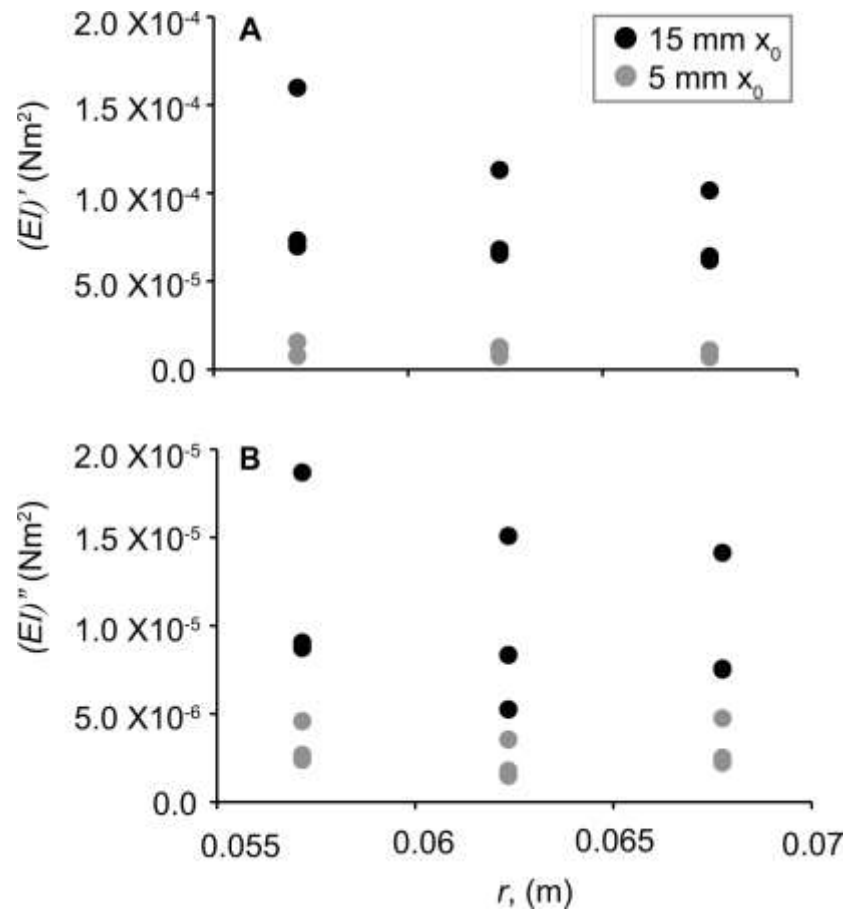

**Fig. S1. Moduli are constant with respect to changes in compressive load superimposed during bending.** As a consequence of bending rig geometry (see Fig. 1), when the moment arm  $r$  is shortened, the compressive load superimposed on the bending load increases. This compressive load was not independently measured, but the effect on the moduli was determined to be negligible by a mixed model ANCOVA, where  $r$  and linear actuator amplitude,  $x_0$ , are the main effects. The ANCOVA model is significant for the elastic stiffness,  $(EI)'_1$  ( $F_{3,14} = 44.61$ ;  $p < 0.0001$ ), and the loss stiffness,  $(EI)''_1$  ( $F_{3,14} = 26.87$ ;  $p < 0.0001$ ), but this is due to amplitude-dependent viscoelastic nonlinearity. (A) Effects test:  $(EI)'_1$  was greater at  $x_0 = 15$  mm compared to  $x_0 = 5$  mm ( $p < 0.0001$ ), also  $r$  and  $r * x_0$  were not significant effects. (B) Effects test:  $(EI)''_1$  was greater at  $x_0 = 15$  mm compared to  $x_0 = 5$  mm ( $p < 0.0001$ ), also  $r$  and  $r * x_0$  were not significant effects. Each data point represents the mechanical test performed on each of the three specimens at  $f = 1$  Hz, at a given  $r$  and a given  $x_0$ .

Table S1. Linear and non-linear viscoelastic properties of vertebral column segments from *Squalus acanthias* using mixed model ANCOVA.

[Click here to Download Table S1](#)
